# Supplementary material for: Lack of cortico-limbic coupling in bipolar disorder and schizophrenia during emotion regulation
Source: PubMed Central journal article supplement — Transl Psychiatry. 2012 Mar 13;2(3):e90–. doi: 10.1038/tp.2012.16 (PMC3309531; doi:10.1038/tp.2012.16), 2012-03-13
Supplement: tp201216x1.pdf [file tp201216x1.pdf]

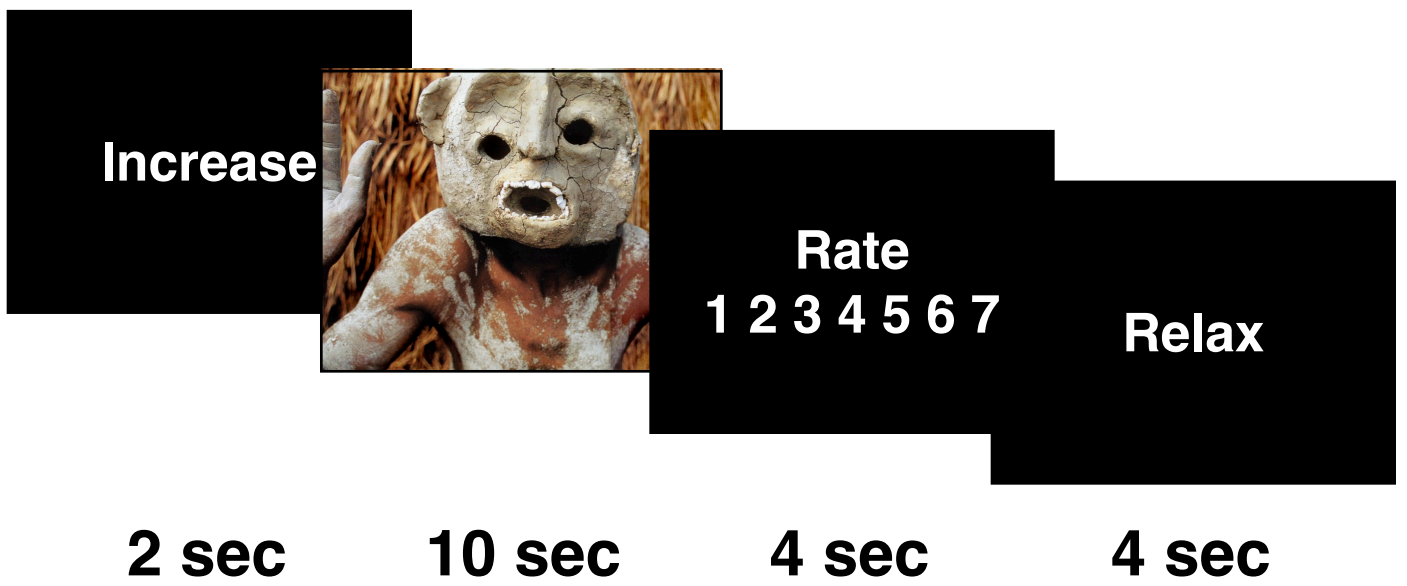

Supplementary Figure 1. Order of stimulus presentation in each trial during the emotion regulation task. Duration of each stimulus is presented below each frame
