# Supplementary material for: Lack of cortico-limbic coupling in bipolar disorder and schizophrenia during emotion regulation
Source: PubMed Central journal article supplement — Transl Psychiatry. 2012 Mar 13;2(3):e90–. doi: 10.1038/tp.2012.16 (PMC3309531; doi:10.1038/tp.2012.16), 2012-03-13
Supplement: tp201216x2.pdf [file tp201216x2.pdf]

## Healthy controls upregulation

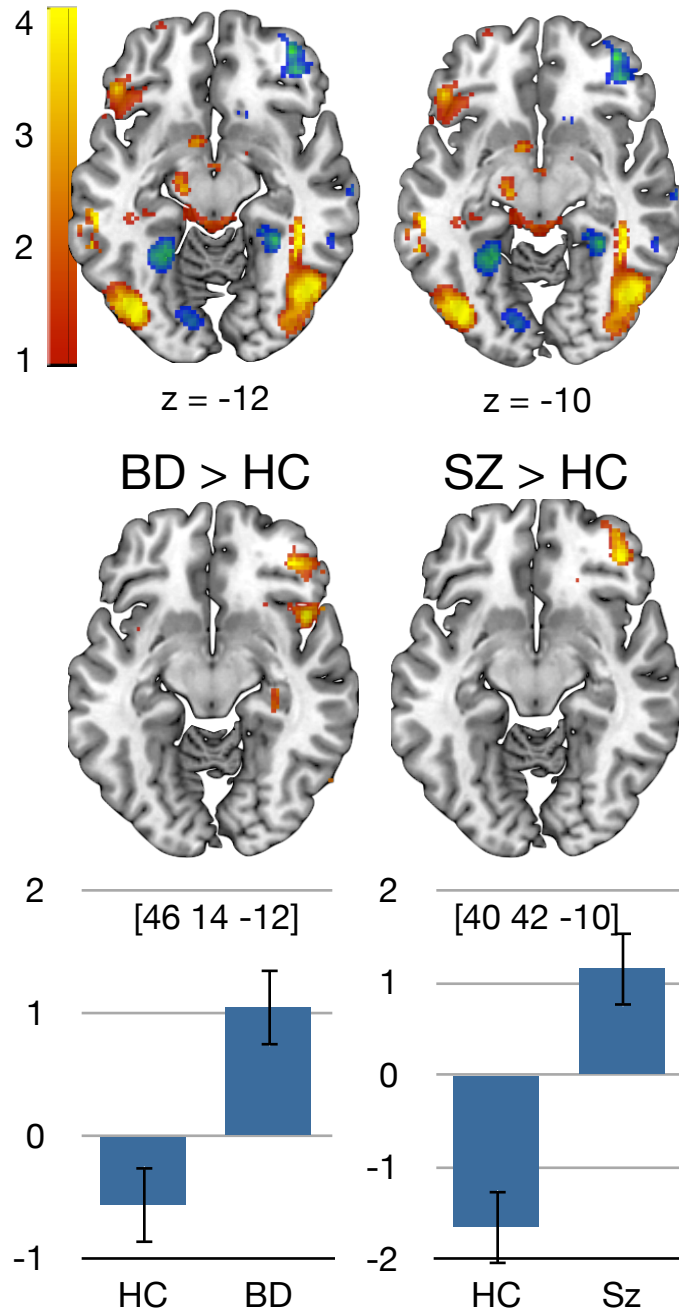

Supplementary figure 2. Activation and deactivation during emotion upregulation in healthy controls and regions of relative hyperactivation in bipolar disorder and schizophrenia,  $p < 0.005$ . Bar charts show beta weights (SEM) at peak voxels in the right VLPFC.
