# Supplementary material for: Lack of cortico-limbic coupling in bipolar disorder and schizophrenia during emotion regulation
Source: PubMed Central journal article supplement — Transl Psychiatry. 2012 Mar 13;2(3):e90–. doi: 10.1038/tp.2012.16 (PMC3309531; doi:10.1038/tp.2012.16), 2012-03-13
Supplement: tp201216x3.pdf [file tp201216x3.pdf]

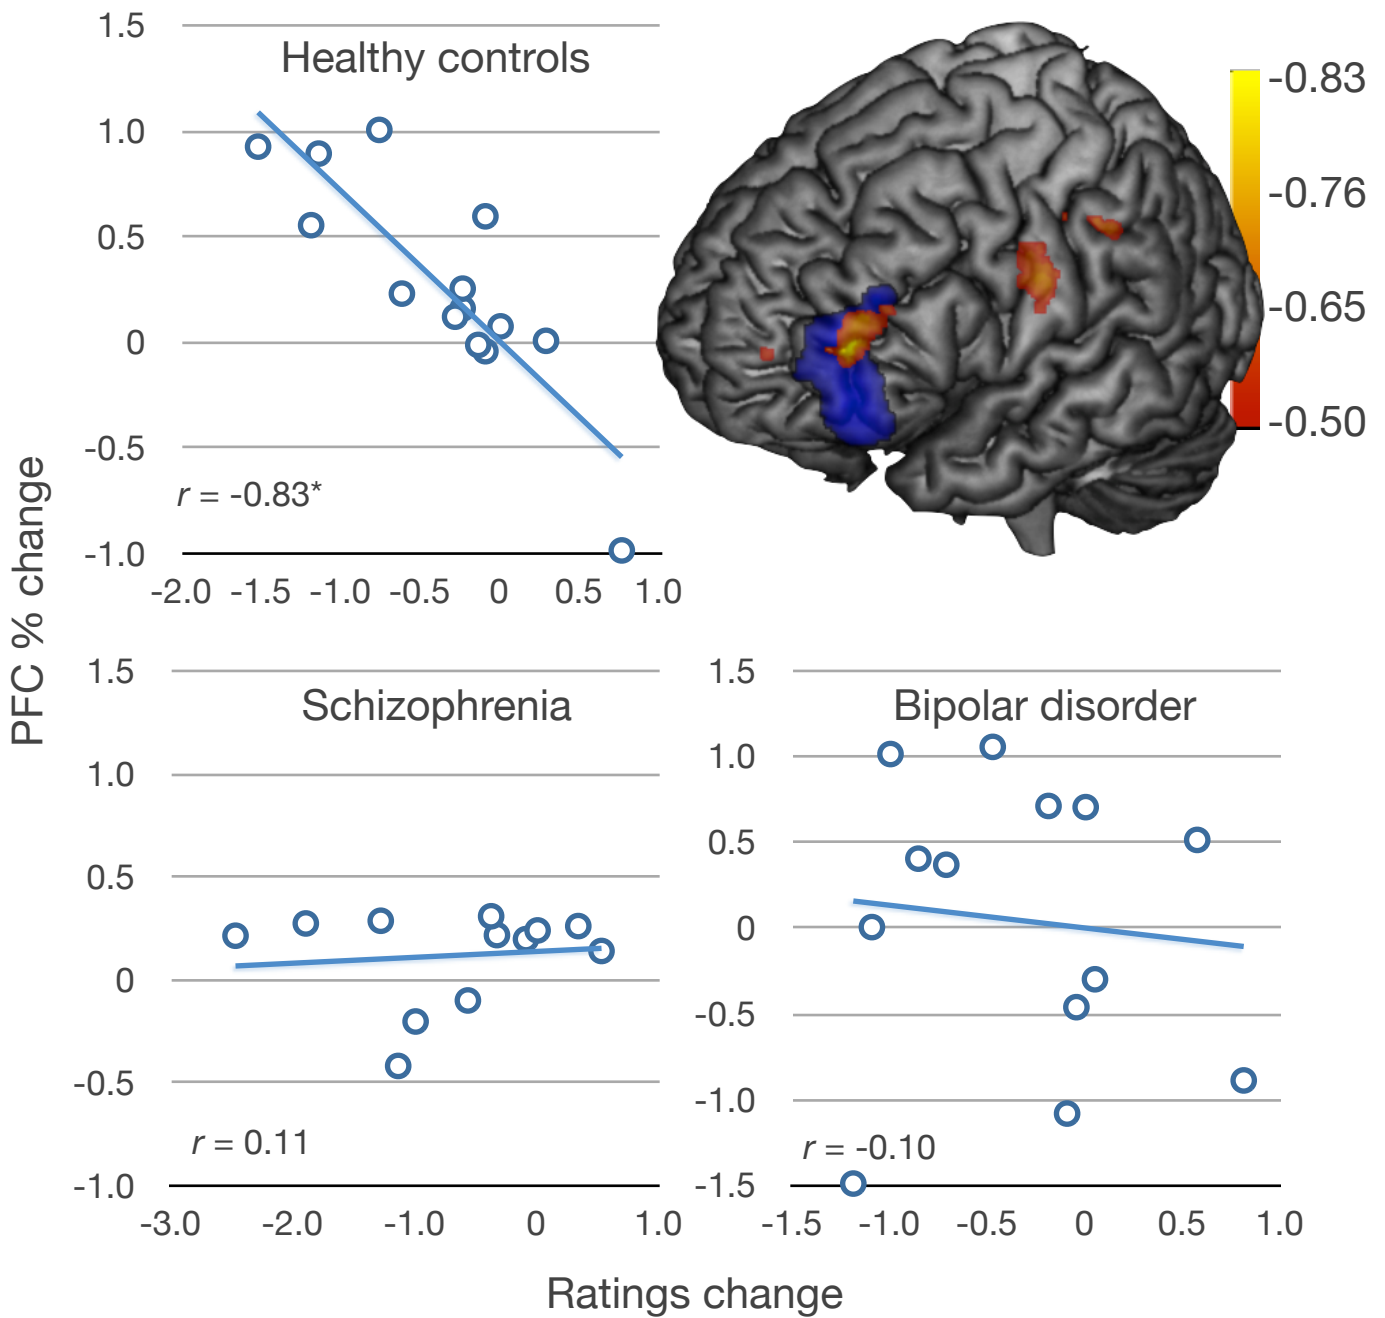

Supplementary Figure 3. Scatterplots showing the correlation between left inferior frontal gyrus responses and changes in subjective affect during downregulation in each group. Brain image shows the location of significant correlation in the PFC (-42 40 16) of healthy controls, color bar represents r-values ( $p < 0.005$ ). Blue shaded area represents region of cortico-limbic coupling.
