# Supplementary material for: Lack of cortico-limbic coupling in bipolar disorder and schizophrenia during emotion regulation
Source: PubMed Central journal article supplement — Transl Psychiatry. 2012 Mar 13;2(3):e90–. doi: 10.1038/tp.2012.16 (PMC3309531; doi:10.1038/tp.2012.16), 2012-03-13
Supplement: tp201216x4.pdf [file tp201216x4.pdf]

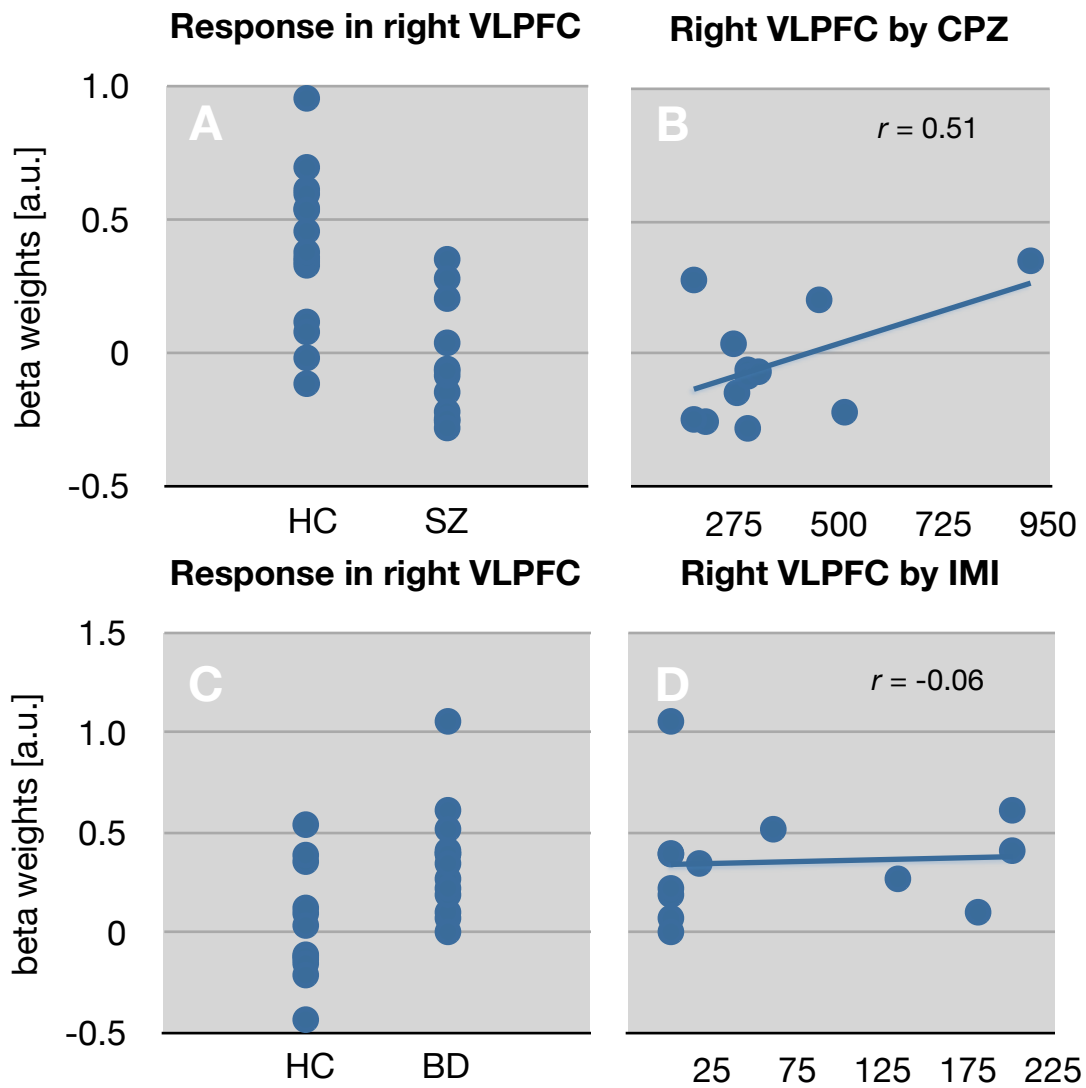

Supplementary figure 4. Individual responses in the right IFG of each group (panels A & C), and responses by drug dose in each patient group (panels B & D). No correlations between medication and response were significant ( $p > .05$ ). CPZ: chlorpromazine equivalent (in mg); IMI: imipramine equivalent (mg).
