# Supplementary material for: Lack of cortico-limbic coupling in bipolar disorder and schizophrenia during emotion regulation
Source: PubMed Central journal article supplement — Transl Psychiatry. 2012 Mar 13;2(3):e90–. doi: 10.1038/tp.2012.16 (PMC3309531; doi:10.1038/tp.2012.16), 2012-03-13
Supplement: tp201216x5.pdf [file tp201216x5.pdf]

## Supplementary Table 1. Regions of activation in the PFC (within-group)

### Downregulation: Healthy adults, k = 264, t-crit = 2.98

Cluster 1: 1774 voxels, peak at (-16 52 32), t = 8.25, z = 1.47, p < 0.001

| Label            | Voxels | mean T |
|------------------|--------|--------|
| brodmann area 45 | 180    | 4.17   |
| brodmann area 47 | 294    | 3.71   |
| brodmann area 11 | 31     | 3.68   |
| brodmann area 8  | 16     | 3.65   |
| brodmann area 9  | 195    | 3.60   |
| brodmann area 32 | 134    | 3.48   |
| brodmann area 10 | 228    | 3.43   |

Cluster 2: 1517 voxels, peak at (48 26 4), t = 6.18, z = 1.54, p < 0.001

| Label            | Voxels | mean T |
|------------------|--------|--------|
| brodmann area 47 | 185    | 3.58   |
| brodmann area 45 | 137    | 4.15   |
| brodmann area 46 | 11     | 4.01   |

### Downregulation: Bipolar disorder, k = 286, t-crit = 3.05

Cluster 1: 1512 voxels, peak at (-50 24 -6), t = 7.31, z = 1.67, p < 0.001

| Label            | Voxels | mean T |
|------------------|--------|--------|
| brodmann area 47 | 210    | 3.85   |
| brodmann area 45 | 112    | 3.64   |
| brodmann area 44 | 30     | 3.50   |
| brodmann area 46 | 11     | 3.27   |

Cluster 2: 1495 voxels, peak at (50 38 -12), t = 6.39, z = 1.99, p < 0.001

| Label            | Voxels | mean T |
|------------------|--------|--------|
| brodmann area 47 | 195    | 4.16   |
| brodmann area 45 | 121    | 3.69   |
| brodmann area 46 | 25     | 3.27   |
| brodmann area 11 | 22     | 4.25   |

Cluster 3: 537 voxels, peak at (6 44 34), t = 5.56, z = 1.29, p = 0.001

| Label            | Voxels | mean T |
|------------------|--------|--------|
| brodmann area 9  | 199    | 3.81   |
| brodmann area 32 | 19     | 3.60   |
| brodmann area 8  | 17     | 3.16   |
| brodmann area 10 | 8      | 3.33   |
| brodmann area 6  | 3      | 3.40   |

### Upregulation: Healthy adults: k = 319, t-crit = 2.98

Cluster 1: 1056 voxels, peak at (-14 10 62), t = 5.26, z = 1.32, p < 0.001

| Label           | Voxels | mean T |
|-----------------|--------|--------|
| brodmann area 6 | 345    | 3.45   |
| brodmann area 8 | 58     | 3.29   |

Cluster 2: 676 voxels, peak at (-46 32 -6), t = 4.17, z = 1.22, p < 0.001

| Label            | Voxels | mean T |
|------------------|--------|--------|
| brodmann area 47 | 71     | 3.37   |
| brodmann area 44 | 21     | 3.08   |
| brodmann area 45 | 15     | 3.25   |

### Upregulation: Bipolar disorder, k = 274, t-crit = 3.05

Cluster 1: 2756 voxels, peak at (-44 10 50), t = 8.78, z = 1.26, p < 0.001

| Label            | Voxels | mean T |
|------------------|--------|--------|
| brodmann area 47 | 266    | 4.03   |
| brodmann area 6  | 194    | 3.92   |
| brodmann area 9  | 103    | 3.53   |
| brodmann area 45 | 52     | 3.42   |
| brodmann area 13 | 39     | 3.27   |
| brodmann area 8  | 29     | 4.37   |
| brodmann area 46 | 9      | 3.82   |

Cluster 2: 481 voxels, peak at (-4 60 26), t = 4.67, z = 1.75, p = 0.002

| Label            | Voxels | mean T |
|------------------|--------|--------|
| brodmann area 9  | 168    | 3.55   |
| brodmann area 10 | 48     | 3.60   |
| brodmann area 32 | 13     | 3.28   |

Cluster 3: 296 voxels, peak at (52 26 0), t = 4.25, z = 1.80, p = 0.034

| Label            | Voxels | mean T |
|------------------|--------|--------|
| brodmann area 47 | 41     | 3.51   |
| brodmann area 45 | 38     | 3.54   |

### Upregulation: Schizophrenia, k = 261, t-crit = 3.11

Cluster 1: 354 voxels, peak at (-42 -6 38), t = 4.41, z = 1.01, p = 0.007

| Label            | Voxels | mean T |
|------------------|--------|--------|
| brodmann area 6  | 84     | 4.44   |
| brodmann area 44 | 23     | 3.34   |
| brodmann area 9  | 9      | 4.08   |

List of significant clusters and associated Brodmann regions with a mean T-value greater than the t-critical (FWER  $p < 0.05$ )
